# Supplementary material for: Exogenous melatonin increases salt tolerance in bitter melon by regulating ionic balance, antioxidant system and secondary metabolism-related genes
Source: Springer Nature journal article supplement (doi:10.1186/s12870-022-03728-0), 2022-07-30
Supplement: MOESM1 [file 12870_2022_3728_MOESM1_ESM.pdf]

**Table S1.** Primer sequences for examined genes.

| Gene                           | Forward (5'—3')                                    | Reference                      |
|--------------------------------|----------------------------------------------------|--------------------------------|
|                                | Reverse (5'—3')                                    |                                |
| <i>α-MMC</i>                   | GTTCTCTCATTCTAATTCTCGCA<br>GTTTTTCCGTCGTAATTGAAGAG |                                |
| <i>MAP30</i>                   | GGAAAATCAATGGTCTGCTCTCT<br>ATTCCCAAGTAGAGTCATGGT   |                                |
| <i>Polypeptide-P</i>           | CGTGATGAAGGCAAAGTGGATGA<br>ACGCATGTTTCAGTTCGCAG    |                                |
| <i>SOS1</i>                    | TCGTCGCTGTTCTCTGTTTGTG<br>CACCAACAACCCCAAATAGCATAA |                                |
| <i>PM H<sup>+</sup>-ATPase</i> | ATTCGTTGGTTTGTTGCCCTT<br>GCATCGTTCACACCATCTCCT     |                                |
| <i>SKOR</i>                    | ATGGATAAGGCTATTTCCGGT<br>CAAAGATGTGGTGTAGCGT       |                                |
| <i>SOAR1</i>                   | GCAATTCTCCTCTTCGTCAGG<br>CCTGACGAAGAGGAGAATTGC     |                                |
| <i>Mc5PTase7</i>               | CCTACCGGCATAAAGGAGCAGAT<br>TTTGCTGGAAGATGGAGCAA    |                                |
| <i>WRKY1</i>                   | AGTGATGGCATAGTCCTCGAT<br>CCAGGAATATGCGAACTTAGCTT   | Rajae Behbahani et al., (2020) |
| <i>PAL</i>                     | ATTGGGAAGCTCATGTTTGC<br>GGTGACGGGATTTGCTAAGA       | Rajae Behbahani et al., (2020) |
| <i>α-tubulin</i>               | AGTGTCTCTCAACCCACTC<br>AGCATGAAGTGGATTCTTGG        |                                |
